# Supplementary material for: Enhanced photocatalytic H2 evolution over covalent organic frameworks through an assembled NiS cocatalyst
Source: Royal Society of Chemistry journal article supplement (doi:10.1039/d2ra02236b), 2022-01-01
Supplement: d2ra02236b1.pdf [file d2ra02236b1.pdf]

## **Supporting Information**

# **Enhanced photocatalytic H<sub>2</sub> evolution over covalent organic framework through assembled NiS cocatalyst**

Hualei Zhang,\* Zheng Lin, and Jia Guo\*

State Key Laboratory of Molecular Engineering of Polymers, Department of  
Macromolecular Science, Fudan University, Shanghai 200438, China.

\*E-mail: 18110440049@fudan.edu.cn; guojia@fudan.edu.cn.

## Section I. Materials and Methods

### 1. Materials

Anhydrous 1,2-dichlorobenzene (o-DCB), anhydrous n-butanol (n-BuOH) and chloroplatinic acid hexahydrate were purchased from Aladdin Industrial. Tetrahydrofuran (THF), acetone, Sodium sulfide nonahydrate, Sodium Sulfite, L(+)-Ascorbic acid and Nickel(II) acetate tetrahydrate were purchased from Shanghai Chemical Regents Company. Methyl Alcohol, Ethanol, Triethanolamine and Ascorbic acid were purchased from Sinopharm Chemical Reagent Co. Ltd. 1,3,5-Triformylphloroglucinol (Tp) and 4,4'-biphenyldiamine (BD) were purchased from Jilin Chinese Academy of Sciences-Yanshen technology Co. Ltd. Ascorbic acid were purchased from Sinopharm Chemical Reagent Co. Ltd. All the chemicals were used without further purification.

### 2. Characterizations

Powder X-ray diffraction (PXRD) patterns were collected at room temperature on an X-ray diffraction spectrometer (Bruker D8 Advance, Germany) with Cu K $\alpha$  radiation at  $\lambda = 0.154$  nm operating at 40 kV and 40 mA. Fourier transform infrared (FT-IR) spectra were recorded on Nicolet 6700 (ThermoFisher, USA) Fourier transformation infrared spectrometer. Solid-state CP/MAS  $^{13}\text{C}$  NMR spectra were recorded on 400WB AVANCE III (Bruker, Switzerland) plus 400 MHz spectrophotometer at 298 K. High-resolution transmission electron microscopy images were obtained using a JEOL 2100F microscope operated at 200 kV accelerating voltage. The elemental mappings of C, N, O and S atoms were collected using the same transmission electron microscope (operating at 200 kV) under the ADF STEM mode. The chemical compositions of samples were examined using X-ray photoelectron spectroscopy (XPS) with Thermo Scientific K-Alpha+. All the XPS spectra were corrected according to C 1s line at 284.6 eV. Diffuse reflectance UV-visible absorption spectra were collected on a Lambda 750 spectrometer (referenced to barium sulphate). On the basis of the Kubelka-Munk (KM) method and the UV visible diffuse absorption spectra by the following equation:

$$\alpha_{hv} = A(hv-E_g)^2,$$

the  $E_g$  of all samples can be calculated experimentally, where  $\alpha$ ,  $A$ ,  $h$ , and  $h\nu$  are the absorption coefficient, constant, and Planck's constant, and photon energy, respectively. Photoluminescence (PL) profiles were performed on Fluorescence Spectrophotometer Qm 40 (PTI, USA) with a 350 nm laser excitation source. The lifetimes of fluorescence spectra was examined by FLS1000 (Edinburgh Instruments, UK) equipped with a 350 nm laser as the excitation source and employing Time Correlated Single Photon Counting (TCSPC) technique. Inductively coupled plasma atomic emission spectroscopy (ICP-AES) was done on a VARIAN VISTA RL simultaneous spectrometer (Agilent Technologies, Santa Clara, California, USA) with a CCD-detector. Nitrogen sorption isotherms were determined at 77 K using the Quantachrome Autosorb-iQ after more than 8 hours of degassing in vacuum at 120 °C.

### **3. Methods**

#### **3.1 Electrochemical measurements**

Electrochemical measurements were measured by CHI760E electrochemical workstation (Chenhua, Shanghai) in a three electrode cell system. The COF powder was ultrasonically dispersed in ethanol for 10 min. Then the dispersion was drop-cast onto the fluorine-doped tin oxide (FTO) conductive glass for the preparation of the working electrode. The Ag/AgCl electrode worked as the reference electrode while the platinum wire worked as the counter electrode. The Mott-Schottky tests were carried out in 0.1 M  $\text{Na}_2\text{SO}_4$  solution as the supporting electrolyte. All of the potentials were calibrated to the Reversible Hydrogen Electrode (RHE). Photocurrent measurements were performed using a 300 W Xe lamp with a cutoff filter ( $\lambda \geq 420$  nm). Electrochemical impedance spectroscopy (EIS) were measured in 0.1 M NaCl solution.

## Section II. Supplementary figures and tables

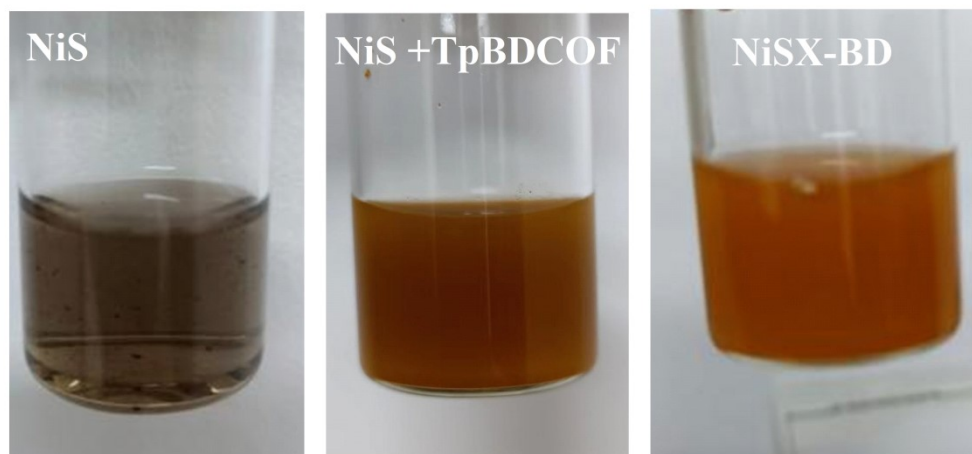

**Figure S1.** The synthetic experiment of NiSX-BD.

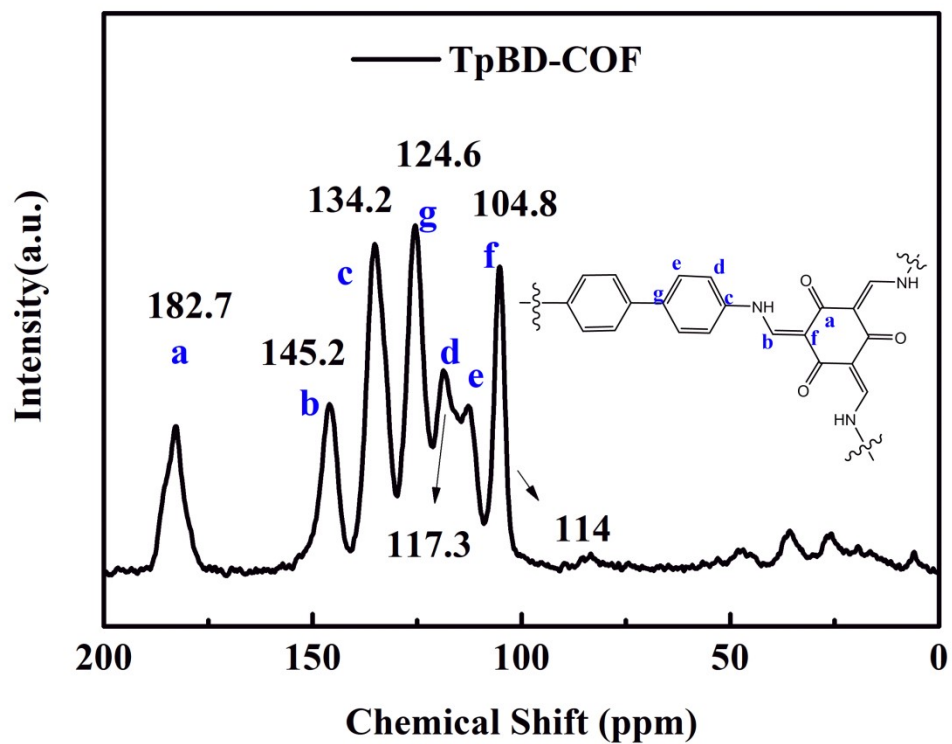

**Figure S2.** Solid-state  $^{13}\text{C}$  NMR spectrum of the TpBD-COF.

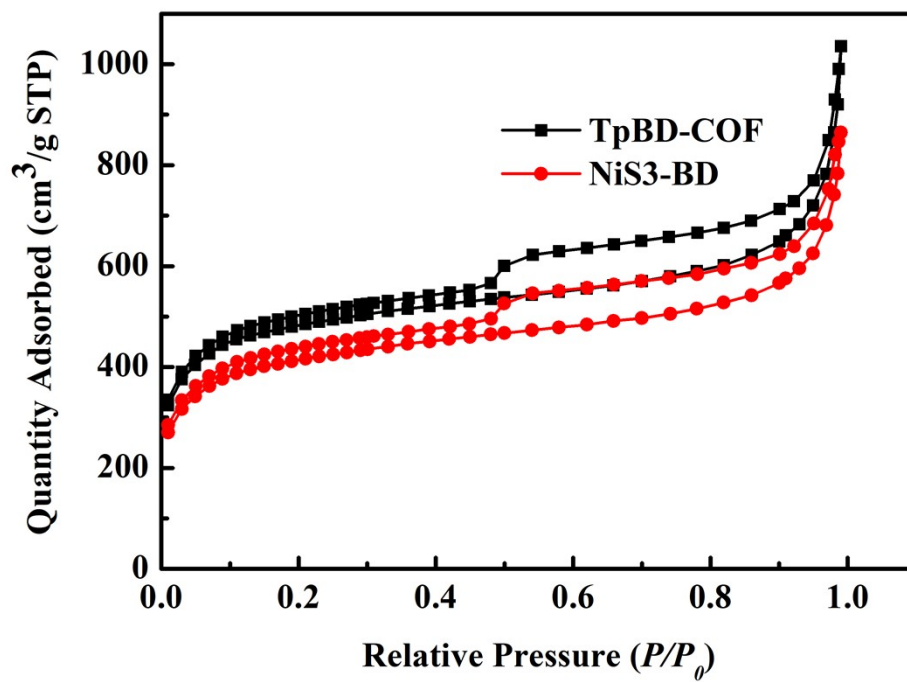

**Figure S3.** N<sub>2</sub> adsorption (closed circles) and desorption (open circles) isotherms (77 K) of the TpBD-COF and NiS3-BD.

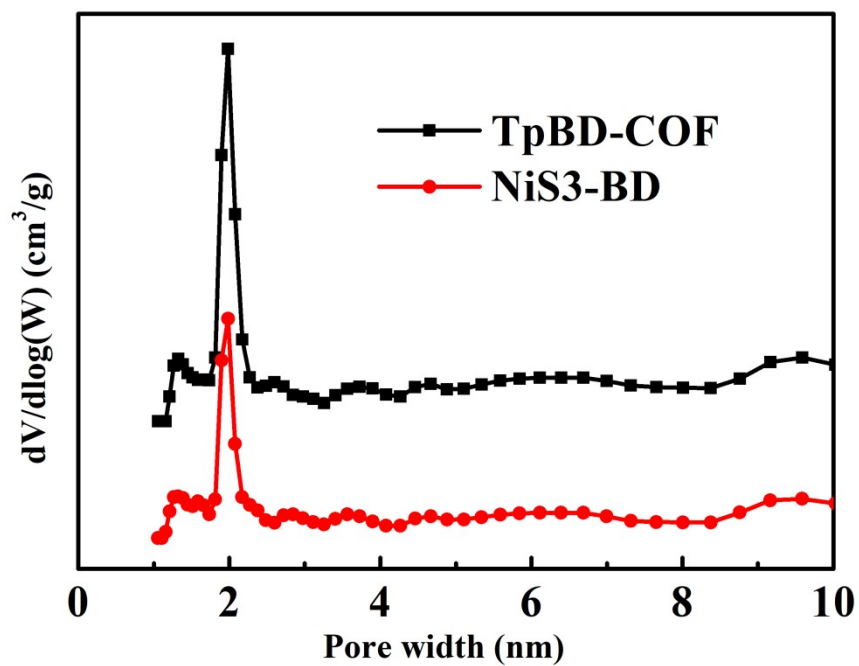

**Figure S4.** Pore-size distributions of TpBD-COF and NiS3-BD.

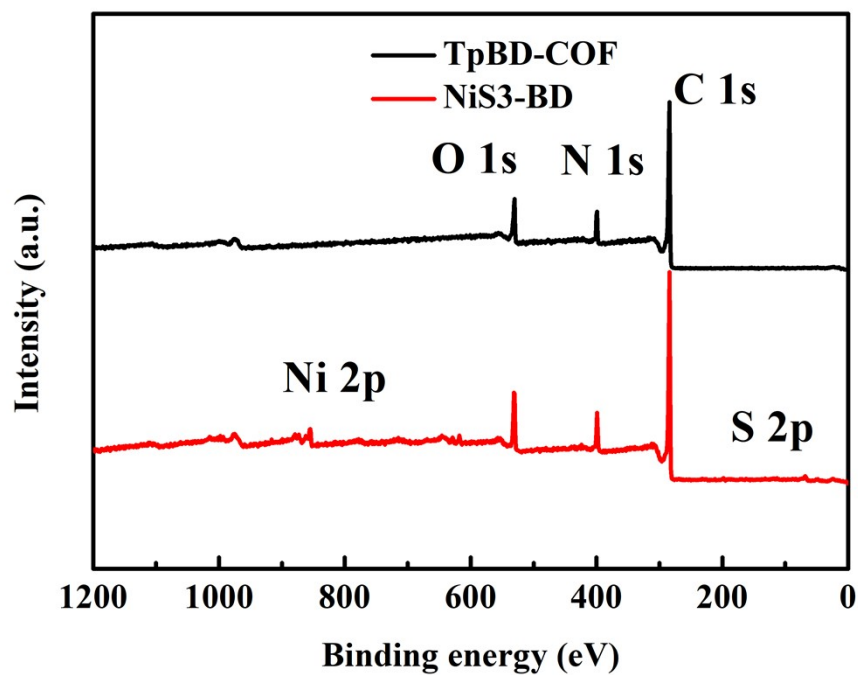

Figure S5. XPS survey spectrum of TpBD-COF and NiS3-BD.

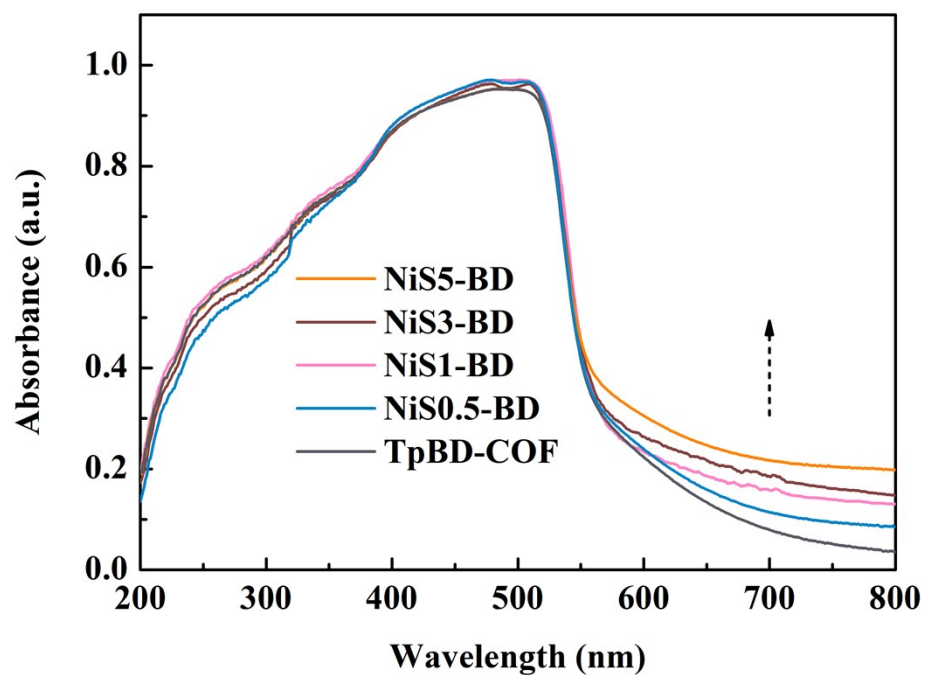

Figure S6. UV-vis diffuse reflectance spectroscopy of TpBD-COF and NiSX-BD.



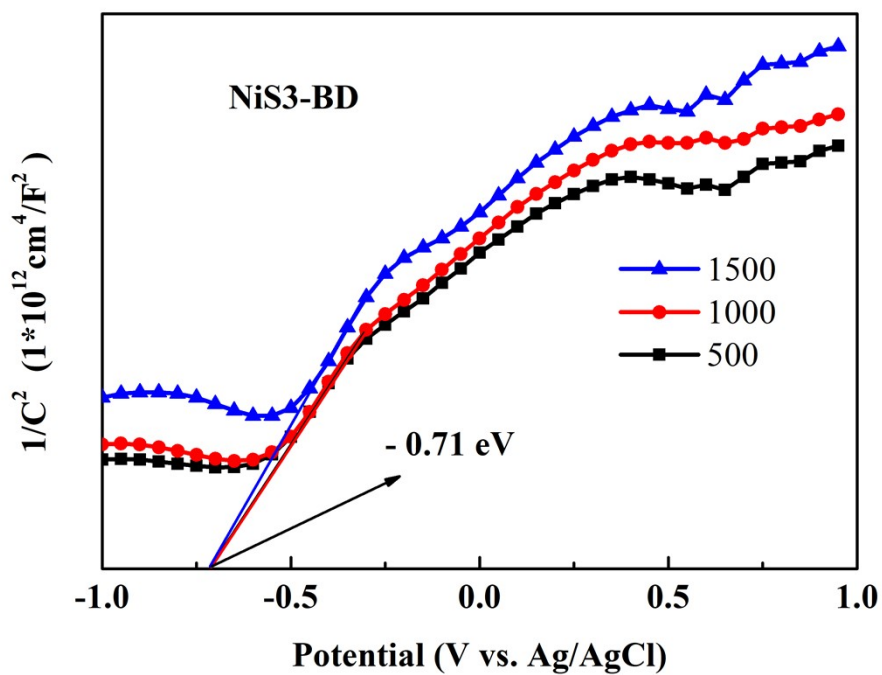

Figure S7. Mott-Schottky plots of the NiS<sub>3</sub>-BD.

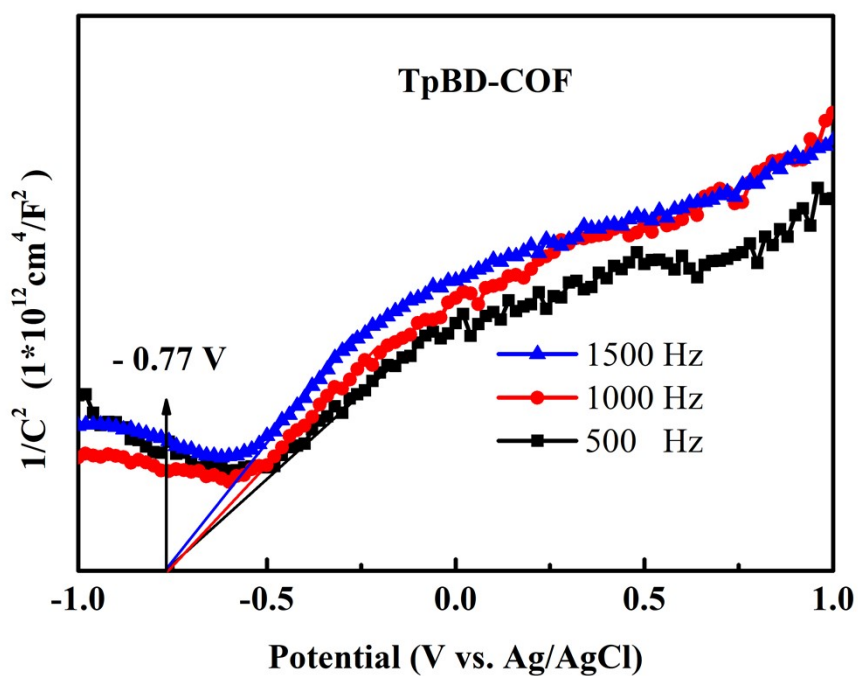

Figure S8. Mott-Schottky plots of the TpBD-COF.

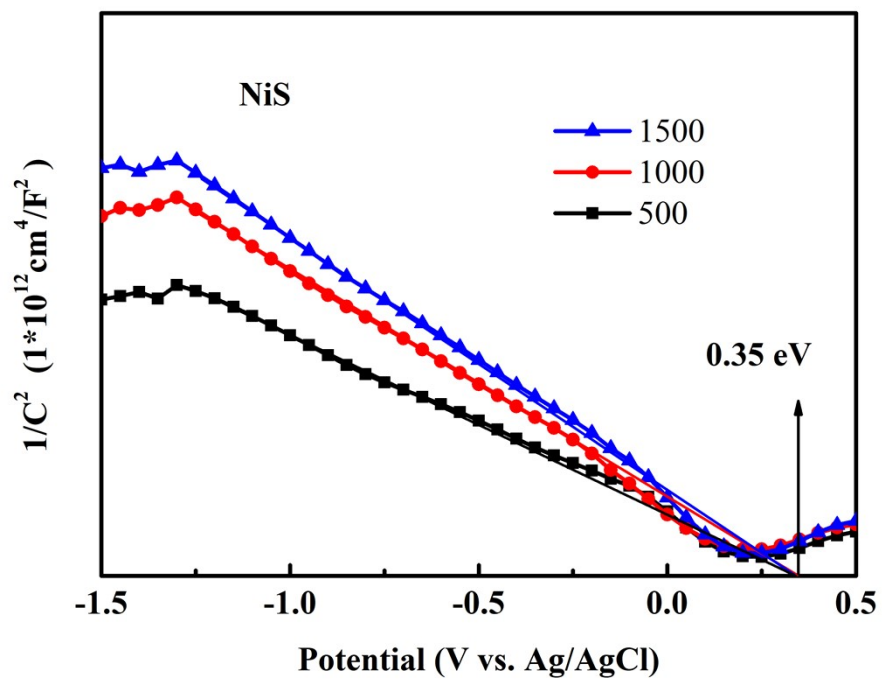

Figure S9. Mott-Schottky plots of the NiS.

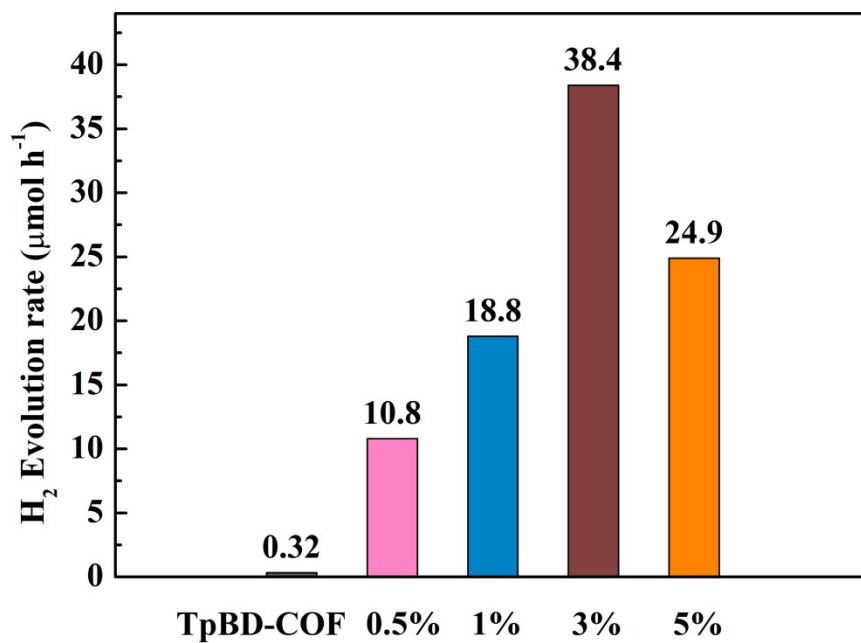

**Figure S10.** Average photocatalytic H<sub>2</sub> evolution rate of TpBD-COF and NiSX-BD photocatalysts with varying NiS loading.

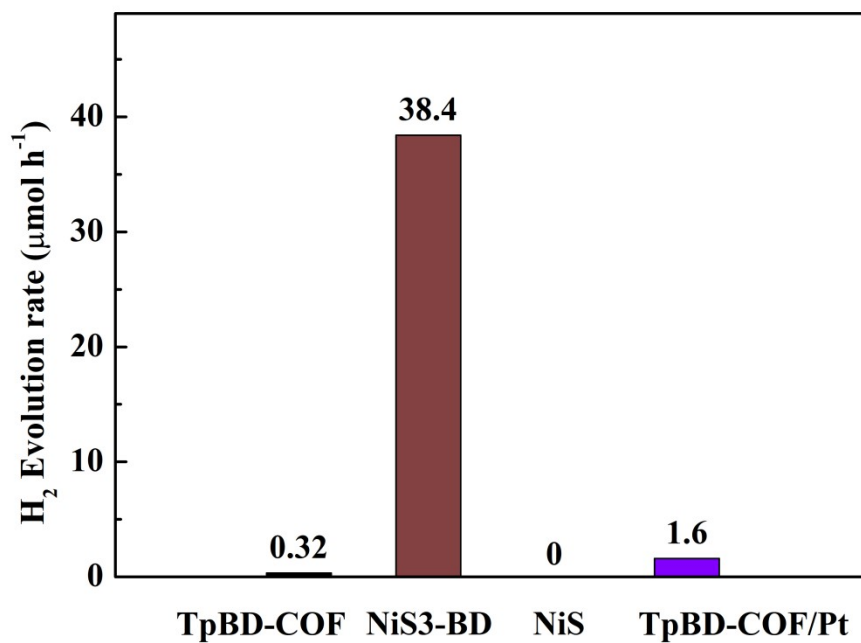

**Figure S11.** Average photocatalytic H<sub>2</sub> evolution rate of TpBD-COF, NiS<sub>3</sub>-BD, NiS, and TpBD-COF/Pt.

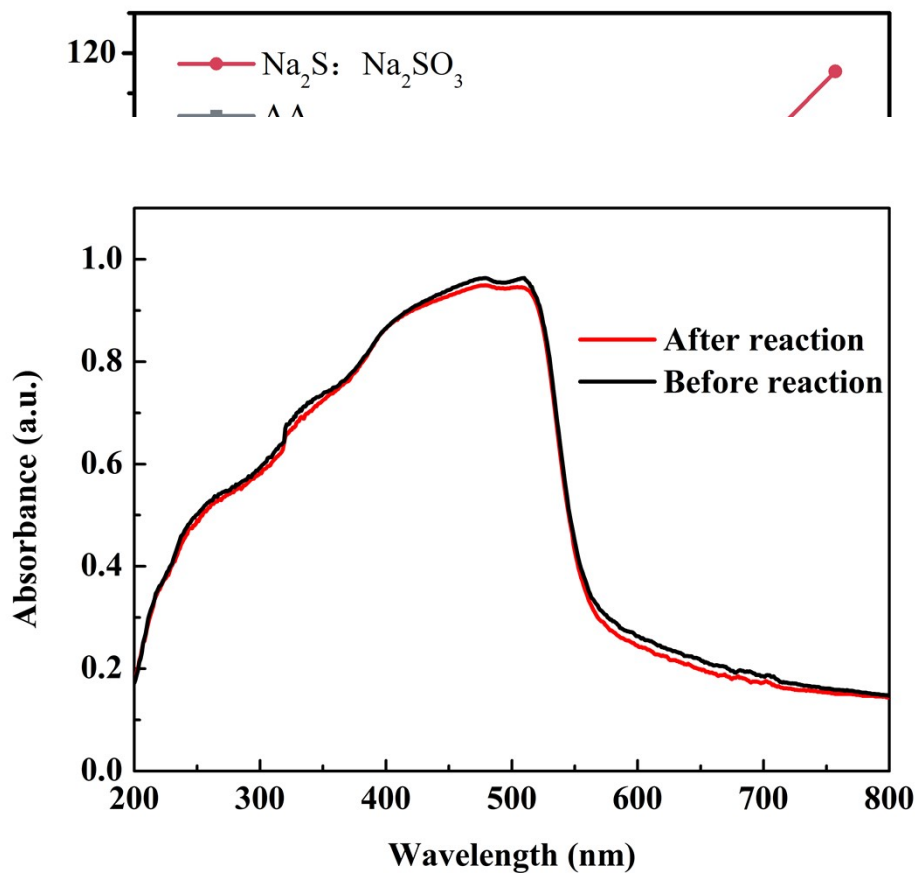

**Figure S12.** Photocatalytic hydrogen production performance of NiS3-BD measured in the presence of different hole scavengers.

**Figure S13.** FT-IR spectra of NiS3-BD before (black) and after 18h (red) photocatalytic process.

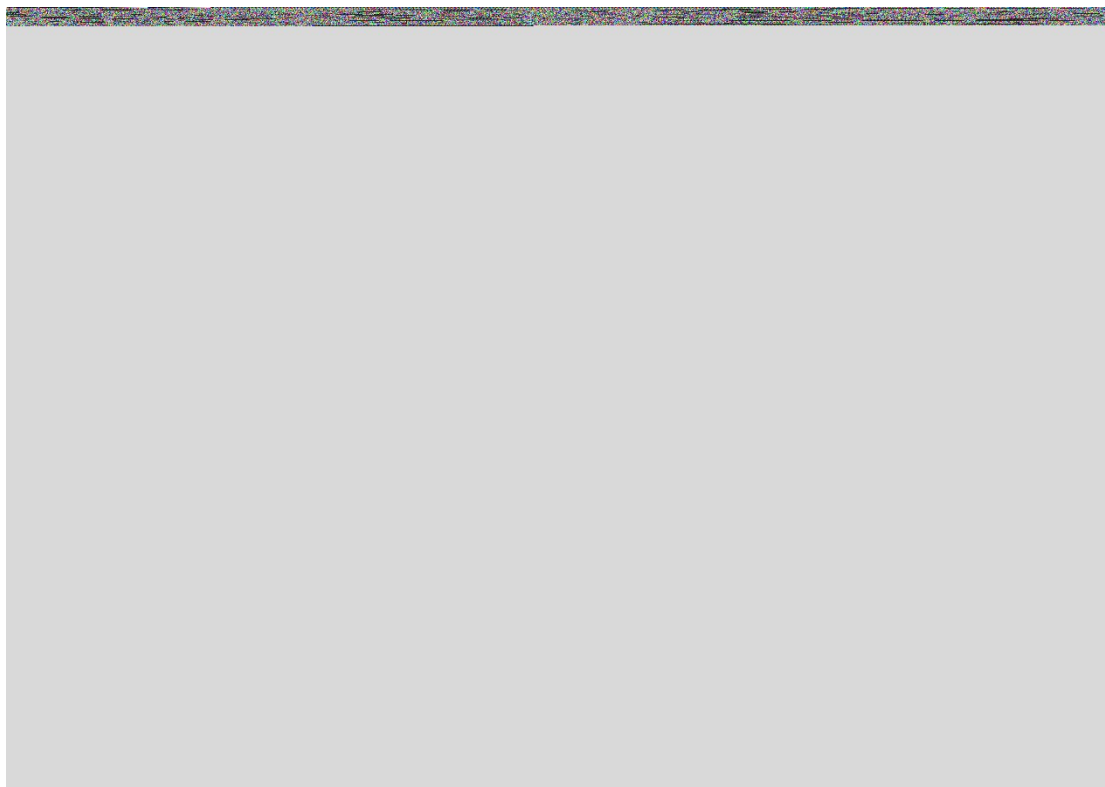

**Figure S14.** UV-vis diffuse reflectance spectroscopy of NiS<sub>3</sub>-BD before (black) and after 18h (red) photocatalytic process measured in the solid state.

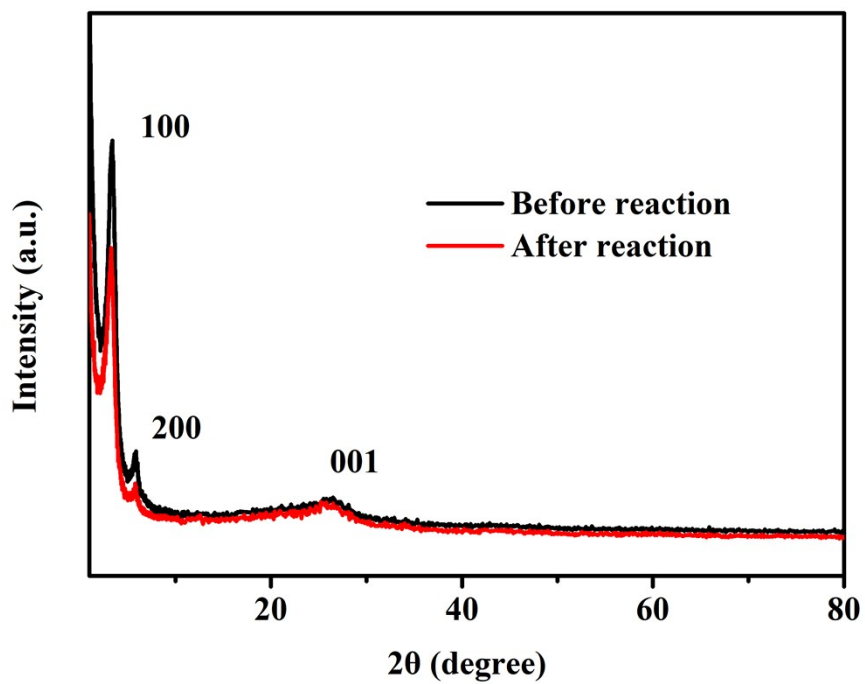

**Figure S15.** Experimental powder X-ray diffraction pattern of the raw NiS<sub>3</sub>-BD (black), and the NiS<sub>3</sub>-BD photocatalyst after 18 h hydrogen evolution experiment under visible light (red).

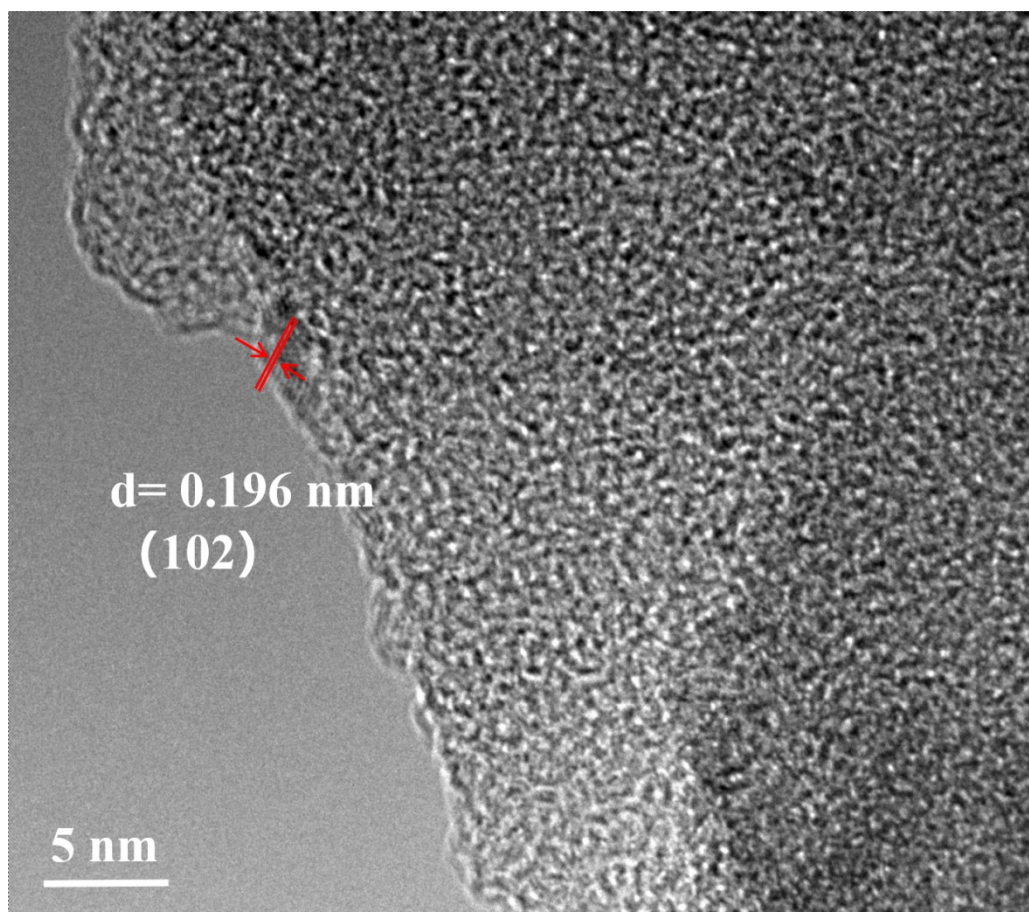

**Figure S16.** HR TEM image of NiS<sub>3</sub>-BD after photocatalytic reaction.



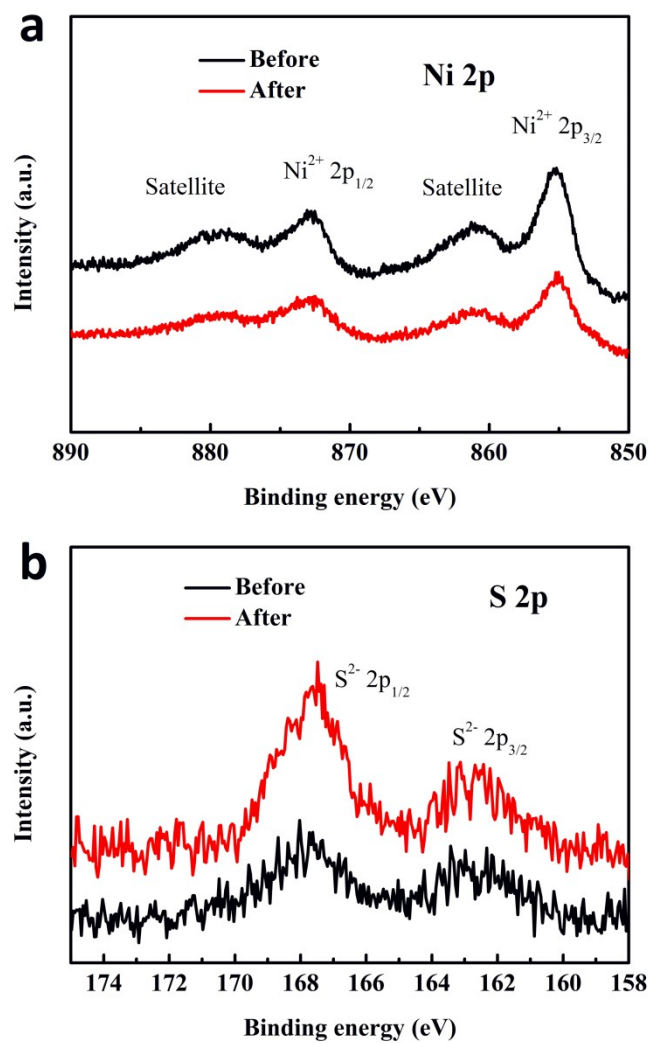

**Figure S17.** XPS of the NiS<sub>3</sub>-BD after the photocatalytic hydrogen production: a) Ni 2p peak; b) S 2p peak.

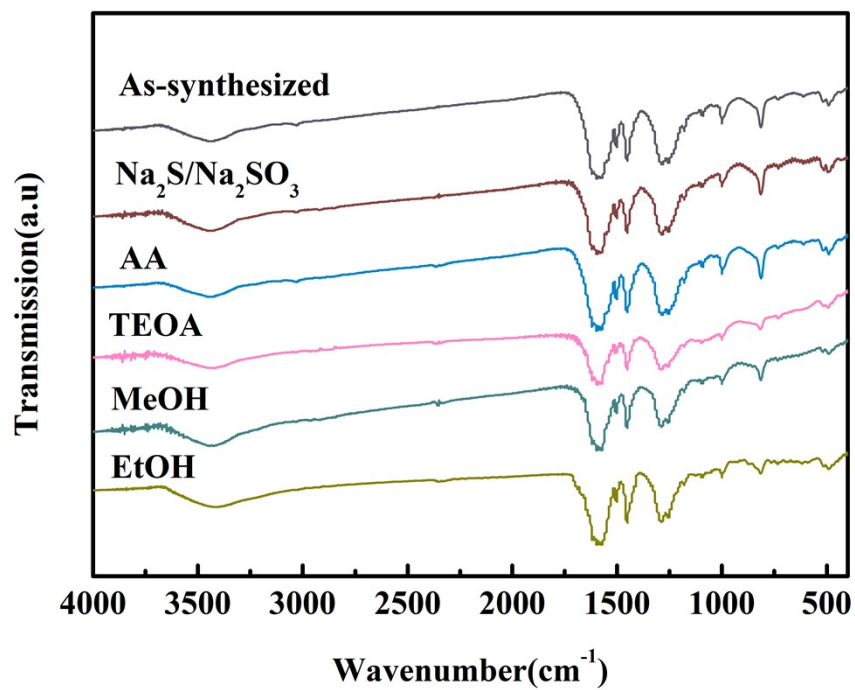

**Figure S18.** FT-IR spectra of the TpBD-COF and immersed in solution with different sacrificial agents for 2 days.

**Table S1.** ICP-AES of NiSX-BD.

|               | NiS0.5-BD | NiS1-BD | NiS3-BD | NiS5-BD |
|---------------|-----------|---------|---------|---------|
| <b>Ni wt%</b> | 0.31      | 0.62    | 1.91    | 3.14    |
| <b>S wt%</b>  | 0.17      | 0.33    | 1.01    | 1.69    |

**Table S2.** Summary of H<sub>2</sub> evolution activity of photocatalysts.

| <b>Catalyst</b>                      | <b>Co-catalyst</b>  | <b>SED</b>                                               | <b>Illumination</b> | <b>Activity,<br/>μmol g<sup>-1</sup> h<sup>-1</sup></b> | <b>AQE<br/>420 nm</b> | <b>Ref</b>           |
|--------------------------------------|---------------------|----------------------------------------------------------|---------------------|---------------------------------------------------------|-----------------------|----------------------|
| <b>TpBD-COF</b>                      | <b>NiS</b>          | <b>Na<sub>2</sub>S/<br/>Na<sub>2</sub>SO<sub>3</sub></b> | <b>&gt; 420 nm</b>  | <b>3840</b>                                             | <b>0.24%</b>          | <b>This<br/>work</b> |
| g-C <sub>3</sub> N <sub>4</sub> /CdS | NiS                 | TEOA                                                     | > 420 nm            | 2563                                                    | -                     | [1]                  |
| TMC/NiS-1.5                          | NiS                 | LA                                                       | Xe lamp             | 638                                                     | -                     | [2]                  |
| Ni(OH) <sub>2</sub> -2.5%/TpPa-2     | Ni(OH) <sub>2</sub> | SA                                                       | > 420 nm            | 1895.99                                                 | -                     | [3]                  |
| TpPa-1-COF                           | MoS <sub>2</sub>    | AA                                                       | > 420 nm            | 5585                                                    | 0.76%                 | [4]                  |
| SnS <sub>2</sub> /TpPa-1-COF         | -                   | AA                                                       | > 420 nm            | 2474                                                    | 0.23%                 | [5]                  |
| FS-COF                               | Pt                  | AA                                                       | > 420 nm            | 10100                                                   | 3.2%                  | [6]                  |
| N <sub>2</sub> -COF                  | Co-1 <sup>a</sup>   | TEOA                                                     | AM1.5               | 782                                                     | 0.16%                 | [7]                  |
| N <sub>2</sub> -COF                  | Co-2 <sup>b</sup>   | TEOA                                                     | AM1.5               | 414                                                     | -                     | [7]                  |
| N <sub>2</sub> -COF                  | Co-1                | TEOA                                                     | AM1.5               | 100                                                     | -                     | [7]                  |
| N <sub>2</sub> -COF                  | Co-1                | TEOA                                                     | AM1.5               | 163                                                     | -                     | [7]                  |
| COF-42                               | Co-1                | TEOA                                                     | AM1.5               | 233                                                     | -                     | [7]                  |
| CdS-COF                              | Pt                  | LA                                                       | > 420 nm            | 3678                                                    | 4.2                   | [8]                  |
| Tp(BT0.05TP0.95)-COF                 | Pt                  | AA                                                       | > 420 nm            | 9840                                                    | 2.34%                 | [9]                  |
| SP <sup>2</sup> -COF <sub>ERDN</sub> | Pt                  | TEOA                                                     | > 420 nm            | 2120                                                    | 0.47%                 | [10]                 |
| TpDTz COF                            | NiME                | TEOA                                                     | AM 1.5              | 941                                                     | 0.2%                  | [11]                 |

AA: Ascorbic Acid, SA: Sodium ascorbate, TEOA: Triethanolamine, LA: lactic acid:

Co-1<sup>a</sup>: [Co(dmgH)<sub>2</sub>pyCl], Co-2<sup>b</sup>: [Co(dmgBF<sub>2</sub>)<sub>2</sub>(OH<sub>2</sub>)<sub>2</sub>].

## References

- 1 J. Yuan, J. Wen, Y. Zhong, X. Li and Y. Fang, *J. Mater. Chem. A.*, 2015, **3** (35): 18244-18255.
- 2 L. Zhang, B. Z Tian, F. Chen and J. L Zhang, *Int. J. Hydrogen. Energy.*, 2012, **37** (22): 17060-17067.
- 3 H. Dong, X. B. Meng, X. Zhang, H. L. Tang and J. W. Liu, *Chem. Eng. J.*, 2020, **379**: 122342.
- 4 M. Y. Gao, C. C. Li, H. L. Tang, X. J. Sun and H. Dong, *J. Mater. Chem. A.*, 2019, **7**, 20193-20200.
- 5 D. Shang, D. Li, B. Chen, B. Luo, Y. Huang and W. Shi, *ACS. Sustain. Chem. Eng.*, 2021, **9**, 14238-14248.
- 6 X. Y. Wang, L. J. Chen, M. A. Zwijnenburg, R. S. Sprick R and I. A. Cooper, *Nat. Chem.*, 2018, **10**, 1180-1189.
- 7 T. Banerjee, F. Haase, G. Savasci, K. Gottschling and C. Ochsenfeld, *J. Am. Chem. Soc.*, 2017, **139** (45): 16228-16234.
- 8 T. Jayshri, B. A. Harshitha, D. Aparna, D. D. David and K. Sreekumar, *Chem. Eur. J.*, 2014, **20** (48): 15961-15965.
- 9 T. Zhou, X. Huang, Z. Mi, Y. Zhu, C. C. Wang and J. Guo, *Poly. Chem.*, 2021, **12**, 250-3256.
- 10 E. Q. Jin, Z. A. Lan, Q. H. Jiang, X. C. Wang and D. L. Jiang, *Chem*, 2019, **5**, 1632-1647.
- 11 B. P. Biswal, G. H. V Gonzalez, T. Banerjee, L. Grunenberg and G. Savasci, *J. Am. Chem. Soc.*, 2019, **141**, 11082-11092.
